# Supplementary material for: Virtual Optimization of Nasal Insulin Therapy Predicts Immunization Frequency to Be Crucial for Diabetes Protection
Source: PubMed Central journal article supplement — Diabetes. 2010 Sep 23;59(12):3148–58. doi: 10.2337/db10-0561 (PMC2992777; doi:10.2337/db10-0561), 2010-09-23

**Supplementary Table 1: Nasal B:9-23 peptide protocols implemented in the *type 1 diabetes* Physiolab platform**

| Protocol        | Initial treatment |           |                    | Follow-up treatment |           |                                              | Laboratory Result | Protected virtual mice <sup>A</sup> |
|-----------------|-------------------|-----------|--------------------|---------------------|-----------|----------------------------------------------|-------------------|-------------------------------------|
|                 | Age (wks)         | Dose (µg) | Schedule           | Age (wks)           | Dose (µg) | Schedule                                     |                   |                                     |
| Daniel [1]      | 4                 | 40        | 3 consecutive days | 9                   | 40        | 3 consecutive days, every 4 wks until 32 wks | Protective        | 12 out of 12                        |
| Kobayashi [2]   | 4                 | 20        | 5 consecutive days | 5                   | 20        | once a wk for 5 wks                          | Not protective    | 0 out of 12                         |
| von Herrath [3] | 10                | 40, 100   | 3x/wk for 2 wks    | 12                  | 40        | once a wk for 5 wks                          | Not protective    | 0 out of 12                         |

<sup>A</sup>: Virtual mice considered protected when blood glucose did not cross 16.67mmol/L throughout the course of simulation

**Supplementary Table 2: Pharmacokinetic (PK) effects of nasal B:9-23 therapy explored in silico**

| Peripheral LT <sup>A</sup> (including NALT)   |                                               |
|-----------------------------------------------|-----------------------------------------------|
| PK effect                                     | Impact on <i>type 1 diabetes</i> pathogenesis |
| Th1 deletion                                  | protective                                    |
| Th2 deletion                                  | pathogenic                                    |
| aTreg deletion                                | pathogenic                                    |
| nTreg deletion                                | pathogenic                                    |
| Th1 induction                                 | pathogenic                                    |
| Th2 induction                                 | protective                                    |
| aTreg induction                               | protective                                    |
| nTreg induction                               | protective                                    |
| Central LT                                    |                                               |
| PK effect                                     | Impact on <i>type 1 diabetes</i> pathogenesis |
| Conventional CD4 <sup>+</sup> thymic deletion | protective                                    |

The therapeutic effect of nasal B:9-23 immunization was explored in silico under three major scenarios in the peripheral LTs: 1) Th1 deletion or induction, 2) Th2 deletion or induction and 3) Treg deletion or induction. All scenarios were considered pathogenic or protective according to previously published results. In the thymus, CD4<sup>+</sup> T cell deletion of conventional and perhaps pathogenic T cells is considered to be beneficial for the course of *type 1 diabetes*.

**Supplementary Table 3: Variations in the underlying pathophysiology of virtual NOD mice**

| Virtual mouse | T cell differentiation bias | Inflammation contribution to beta cell exhaustion | Dynamic NK cell representation | Innate Treg suppression of adaptive Treg | High Treg proliferation rate | Age of diabetes onset |
|---------------|-----------------------------|---------------------------------------------------|--------------------------------|------------------------------------------|------------------------------|-----------------------|
| VM1           | Th1                         | yes                                               | no                             | no                                       | no                           | 19 wks                |
| VM2           | Balanced                    | yes                                               | no                             | no                                       | no                           | 19 wks                |
| VM3           | High Th1                    | yes                                               | no                             | no                                       | no                           | 19 wks                |
| VM4           | Th2                         | yes                                               | no                             | no                                       | no                           | 24 wks                |
| VM5           | Th1                         | yes                                               | yes                            | no                                       | no                           | 19 wks                |
| VM6           | Balanced                    | yes                                               | yes                            | no                                       | no                           | 19 wks                |
| VM7           | Th1                         | yes                                               | no                             | yes                                      | no                           | 19 wks                |
| VM8           | Th1                         | yes                                               | no                             | no                                       | yes                          | 19 wks                |
| VM9           | Th1                         | no                                                | no                             | no                                       | no                           | 19 wks                |
| VM10          | Balanced                    | no                                                | no                             | no                                       | no                           | 19 wks                |
| VM11          | Th1                         | no                                                | yes                            | no                                       | no                           | 19 wks                |
| VM12          | Balanced                    | no                                                | yes                            | no                                       | no                           | 19 wks                |

Twelve virtual NOD mice (VM) were generated according to some well but also poorly described biological phenomena to occur and have an impact on *type 1 diabetes* pathogenesis. Each one VM represents different possible scenarios of all these parameters being operative or not, since currently it is not well understood how they can precisely affect *type 1 diabetes* onset. Nevertheless, all VM that represent the in silico platform used for the purposes of the present study develop diabetes.

**Supplementary Table 4: The number of predictions tested in wet lab**

| Predicted by the T1D Physiolab platform                                                                                                                                            | Results obtained in the wet-lab                                                                                                                                                                                                                                                                   | Results shown in     |
|------------------------------------------------------------------------------------------------------------------------------------------------------------------------------------|---------------------------------------------------------------------------------------------------------------------------------------------------------------------------------------------------------------------------------------------------------------------------------------------------|----------------------|
| Low-frequency nasal B:9-23 peptide immunization protects virtual NOD mice from T1D development, while high-frequency immunization does not                                         | Low -requecy immunization was more beneficial in protecting real NOD mice from T1D development, while high-frequency immunization only delayed but did not overall protect from the disease                                                                                                       | Fig. 3               |
| Low-frequency immunization induces aTreg in the blood and NALT but not in the PDLN 2-3 weeks after immunization following the low and not the high-frequency immunization protocol | Low-frequency immunization induced Treg (cannot distinguish aTreg from iTreg) in the spleen and blood but not in the PDLN at the window that was predicted and only with the low-frequency immunization protocol                                                                                  | Fig. 3               |
| Low-frequency immunization decreases insulinitis but increases aTreg numbers in the pancreatic islets                                                                              | Upon low but not high- frequency immunization reduced insulinitis was seen, while Treg (Foxp3 <sup>+</sup> ) frequency was elevated in both low and high-frequency immunized mice in pancreatic islets with high degree of insulinitis. Low-frequency immunization showed highest Treg frequency. | Fig. 4               |
| Low-frequency immunization increases inraislet IL-10 and IL-4 produced by the infiltrating lymphocytes                                                                             | Low-frequency immunization induced IL-10 production by inraislet lymphocytes but no significantly elevated levels of IL-4 were seen (ELISPOT assay)                                                                                                                                               | Fig. 5               |
| Low-frequency immunization- induced tolerance is sensitive to IL-10 but not to IL-4 neutralization                                                                                 | Upon IL-10 neutralization the tolerogenic effect mediated by low-frequency immunization was lost (IL-4 neutralization was not conducted)                                                                                                                                                          | Fig. 7               |
| The platform is not developed to make predictions regarding immunological events taking place in the spleen                                                                        | In the spleen IFN $\gamma$ was induced after lo-frequency immunization, while IFN $\gamma$ /IL-4 in the blood and IL-10 in the PDLN were seen                                                                                                                                                     | Fig. 6               |
| Efficacy of low-frequency nasal therapy was predicted to decrease if treatment is started at a later age                                                                           | Treatments that began at 9 instead of 4 wks of age showed a lesser protective effect, consistent with the simulation results                                                                                                                                                                      | Suppl Fig. <u>12</u> |

**Supplementary FIG. 1: Multiphasic age dependent efficacy for nasal B:9-23 peptide therapy.** Graphic representation of Daniel protocol (A). Nasal B:9-23 peptide treatment was simulated in VM according to this protocol but starting at various ages and efficacy was assessed. Note that age at treatment has been normalized to the average age of onset observed in the laboratory for NOD mice (15 wks compared to 19 wks in the VM cohort) (B). C: NOD mice were treated with the Daniel protocol starting at 4 or 9wks of age and blood glucose was monitored over time. More than 12 mice were analyzed per group in two independent experiments. \*,  $p < 0.05$  between PBS and Daniel immunization protocol initiated at 4 wks of age.

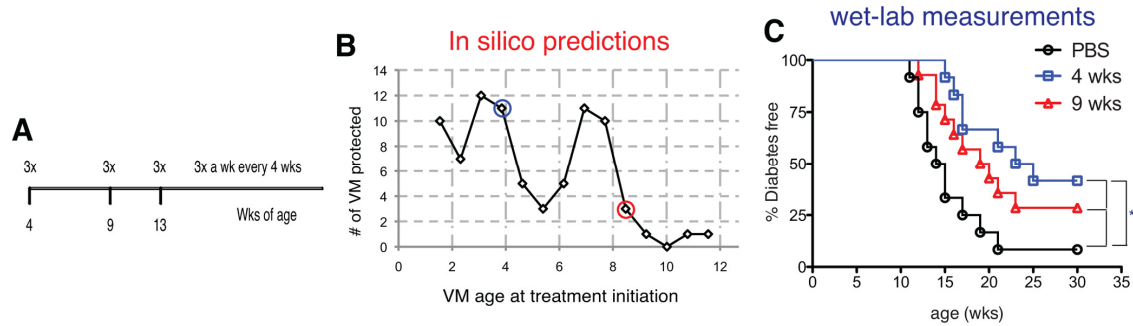

Supplement: supp_db10-0561_db100561onlineappendix.pdf [file supp_db10-0561_db100561onlineappendix.pdf]
